# Supplementary material for: The association between cholecystectomy and the risk of colorectal cancer: an updated systematic review and meta-analysis of cohort studies
Source: PubMed Central journal article supplement — Transl Cancer Res. 2023 May 22;12(6):1452–65. doi: 10.21037/tcr-22-2049 (PMC10331452; doi:10.21037/tcr-22-2049), 2023-05-22
Supplement: tcr-12-06-1452-supplementary.pdf [file tcr-12-06-1452-supplementary.pdf]

Table S1 Data extraction and quality assessment of studies by NOS

| Study                            | RR   | 95% CI      |             | Selection | Comparability | Outcome | Total NOS |
|----------------------------------|------|-------------|-------------|-----------|---------------|---------|-----------|
|                                  |      | Lower limit | Upper limit |           |               |         |           |
| Linos <i>et al.</i> , 1981       | 1.30 | 0.95        | 1.78        | ★★★★      | –             | ★★★     | 7         |
| Adami <i>et al.</i> , 1983       | 0.85 | 0.68        | 1.07        | ★★★★      | –             | ★★      | 6         |
| Adami <i>et al.</i> , 1987       | 0.91 | 0.77        | 1.07        | ★★★★      | –             | ★★★     | 7         |
| Nielsen <i>et al.</i> , 1991     | 1.08 | 0.82        | 1.40        | ★★★★      | –             | ★★★     | 7         |
| Goldbohm <i>et al.</i> , 1993    | 1.60 | 1.16        | 2.19        | ★★★       | ★★            | ★★★     | 8         |
| Ekbohm <i>et al.</i> , 1993      | 0.99 | 0.92        | 1.07        | ★★★★      | –             | ★★      | 6         |
| Johansen <i>et al.</i> , 1996    | 1.09 | 1.00        | 1.18        | ★★★★      | ★             | ★★      | 7         |
| Lagergren <i>et al.</i> , 2001   | 1.01 | 0.92        | 1.11        | ★★★★      | –             | ★★★     | 7         |
| Shao <i>et al.</i> , 2005        | 1.32 | 1.16        | 1.48        | ★★★★      | ★             | ★★      | 7         |
| Goldacre <i>et al.</i> , 2005    | 1.02 | 0.93        | 1.11        | ★★★★      | –             | ★★      | 6         |
| Goldacre <i>et al.</i> , 2012    | 1.24 | 1.02        | 1.51        | ★★★★      | ★★            | ★★      | 8         |
| Chen <i>et al.</i> , 2014        | 1.56 | 1.12        | 2.17        | ★★★★      | ★★            | ★       | 7         |
| Shabanzadeh <i>et al.</i> , 2017 | 1.35 | 0.73        | 2.51        | ★★★★      | ★             | ★★★     | 8         |
| Lee <i>et al.</i> , 2018         | 0.79 | 0.56        | 1.10        | ★★★★      | ★★            | ★★      | 8         |
| Chen <i>et al.</i> , 2020        | 0.66 | 0.6         | 0.73        | ★★★★      | ★★            | ★★★     | 9         |
| Kim <i>et al.</i> , 2020         | 2.08 | 1.28        | 3.17        | ★★★★      | –             | ★★      | 6         |
| Jung <i>et al.</i> , 2021        | 1.55 | 1.48        | 1.63        | ★★★★      | –             | ★★      | 6         |
| Choi <i>et al.</i> , 2022        | 1.03 | 0.88        | 1.21        | ★★★★      | ★★            | ★★      | 8         |

★ represents one point in Newcastle-Ottawa Scale scoring system. RR, relative risk; CI, confidential interval; NOS, Newcastle-Ottawa Scale.
